# Supplementary material for: Development of Controlled-Release Carbamide Peroxide Loaded Nanoemulgel for Tooth Bleaching: In Vitro and Ex Vivo Studies
Source: MDPI journal article supplement (doi:10.3390/ph14020132), 2021-02-07

## Supplementary Material

# Development of Controlled-Release Carbamide Peroxide Loaded Nanoemulgel for Tooth Bleaching: In Vitro and Ex Vivo Studies

Siriporn Okonogi <sup>1,2,\*</sup>, Adchareeya Kaewpinta <sup>3</sup>, Sakornrat Khongkhunthian <sup>2,4</sup> and Pisaisit Chaijareenont <sup>2,5</sup>

<sup>1</sup> Department of Pharmaceutical Sciences, Faculty of Pharmacy, Chiang Mai University, Chiang Mai 50200, Thailand

<sup>2</sup> Research Center of Pharmaceutical Nanotechnology, Chiang Mai University, Chiang Mai 50200, Thailand; ); sakornratk@hotmail.com (S.K.); yodent@hotmail.com (P.C.)

<sup>3</sup> Interdisciplinary Program in Nanoscience and Nanotechnology, Faculty of Science, Chiang Mai University, Chiang Mai 50200, Thailand; akaewpinta@gmail.com

<sup>4</sup> Department of Restorative Dentistry and Periodontology, Faculty of Dentistry, Chiang Mai University, Chiang Mai 50200, Thailand

<sup>5</sup> Department of Prosthodontics, Faculty of Dentistry, Chiang Mai University, Chiang Mai 50200, Thailand

\* Correspondence: okng2000@hotmail.com; Tel.: +66-53-944-311

---

**Figure S1:** Release kinetics of CP from gel formulations according to (a) zero-order kinetics, (b) first-order kinetics, (c) Higuchi model, and (d) Korsmeyer–Peppas model.

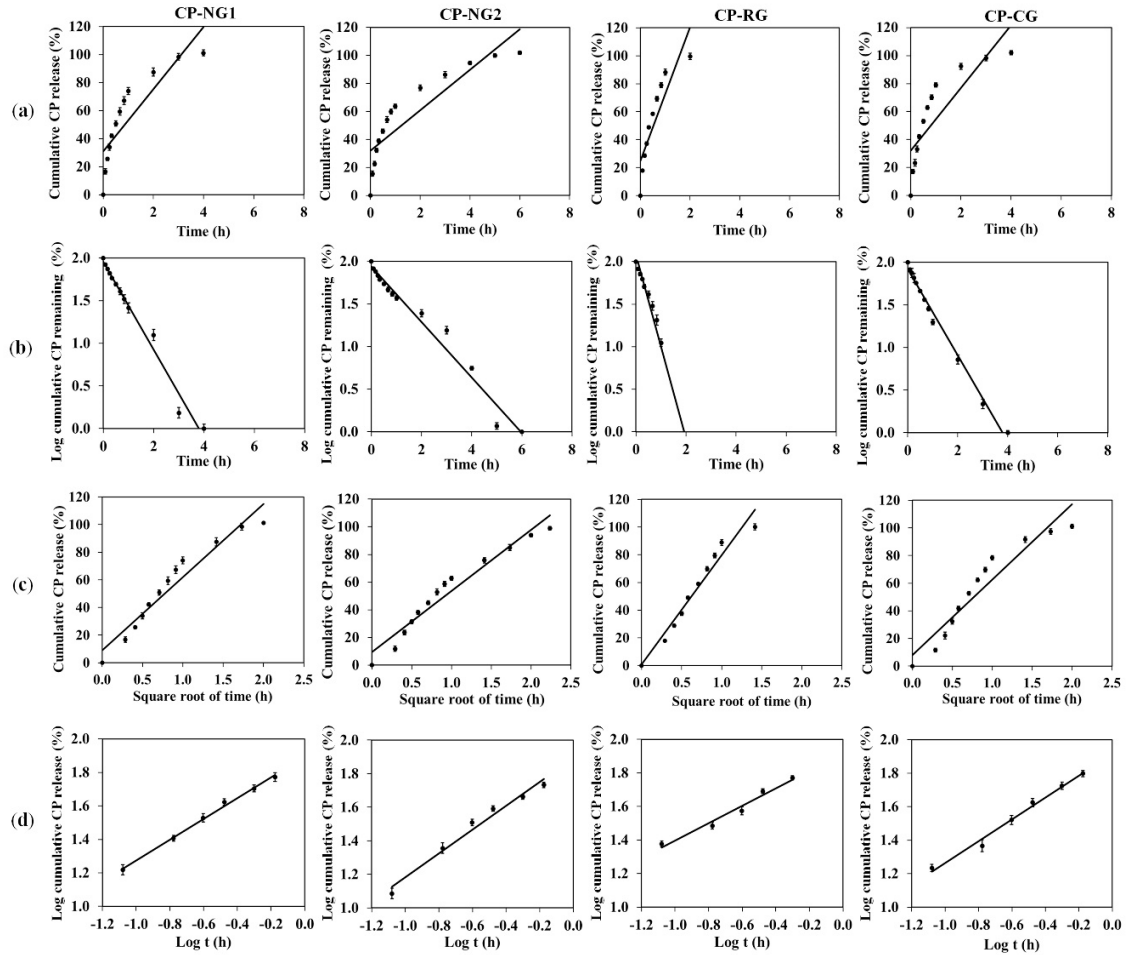

Supplement: s1 [file s1]
